# MGMT Promoter Methylation Status Is Not Related to Histological or Radiological Features in IDH Wild-type Glioblastomas

Vilde Elisabeth Mikkelsen , MD, Hong Yan Dai, PhD, Anne Line Stensjøen, MD, PhD, Erik Magnus Berntsen , MD, PhD, Øyvind Salvesen, PhD, Ole Solheim , MD, PhD, and Sverre Helge Torp , MD, PhD

## Abstract

O<sup>6</sup>-methylguanine DNA methyltransferase (*MGMT*) promoter methylation is an important favorable predictive marker in patients with glioblastoma (GBM). We hypothesized that *MGMT* status could be a surrogate marker of pretreatment tumor biology observed as histopathological and radiological features. Apart from some radiological studies aiming to noninvasively predict the *MGMT* status, few studies have investigated relationships between *MGMT* status and phenotypical tumor biology. We have therefore aimed to investigate such relationships in 85 isocitrate dehydrogenase (*IDH*) wild-type GBMs. *MGMT* status was determined by methylation-specific PCR and was assessed for associations with 22 histopathological features, immunohistochemical proliferative index and microvessel density measurements, conventional magnetic resonance imaging characteristics, preoperative speed of tumor growth, and overall sur-

vival. None of the investigated histological or radiological features were significantly associated with *MGMT* status. Methylated *MGMT* status was a significant independent predictor of improved overall survival. In conclusion, our results suggest that *MGMT* status is not related to the pretreatment phenotypical biology in *IDH* wild-type GBMs. Furthermore, our findings suggest the survival benefit of *MGMT* methylated GBMs is not due to an inherently less aggressive tumor biology, and that conventional magnetic resonance imaging features cannot be used to noninvasively predict the *MGMT* status.

**Key Words:** Angiogenesis, Glioblastoma, Histopathology, Magnetic resonance imaging, *MGMT* promoter methylation, Tumor growth.

## INTRODUCTION

Glioblastomas (GBMs) are the most common of the primary malignant brain tumors in adults (1). The overall survival is only 14–16 months despite standard treatment of surgical resection and adjuvant concomitant radiation and chemotherapy (temozolomide) (2, 3). GBMs are biologically highly complex and aggressive tumors, illustrated by their rapid growth (4) and heterogeneous histological and molecular pathology (5–7).

O<sup>6</sup>-methylguanine DNA methyltransferase (*MGMT*) promoter methylation is an important predictive biomarker of improved response to temozolomide in GBMs (8, 9). *MGMT* is a DNA-repair enzyme that removes alkylated guanine residues on DNA, and hence counteracts the effect of alkylating agents, such as temozolomide (10). Methylation of the *MGMT* promoter leads to inactivation of the enzyme, which is believed to cause the predictive effect (10). However, it is not yet established whether it is purely a predictive marker or in part prognostic by itself, as previous studies have shown conflicting results regarding its prognostic value among patients who did not receive chemotherapy (8, 11–15). As *MGMT* promoter methylation status guides treatment decisions regarding chemotherapy (9), several radiological studies have sought to

From the Department of Clinical and Molecular Medicine, Faculty of Medicine and Health Sciences, NTNU—Norwegian University of Science and Technology (VEM, SHT); Department of Pathology, St Olav's University Hospital (HYD, SHT); Department of Circulation and Medical Imaging, Faculty of Medicine and Health Sciences, NTNU—Norwegian University of Science and Technology (ALS, EMB); Department of Radiology and Nuclear Medicine, St. Olav's University Hospital (EMB); Department of Public Health and Nursing (ØS); Department of Neuromedicine and Movement Science (OS), Faculty of Medicine and Health Sciences, NTNU—Norwegian University of Science and Technology; and Department of Neurosurgery, St. Olav's University Hospital (OS), Trondheim, Norway.

Send correspondence to: Vilde Elisabeth Mikkelsen, MD, Department of Clinical and Molecular Medicine, Faculty of Medicine and Health Sciences, NTNU—Norwegian University of Science and Technology, 7491 Trondheim, Norway; E-mail: vilde.e.mikkelsen@ntnu.no

V.E.M. and A.L.S. have received research scholarships from NTNU—Norwegian University of Science and Technology. O.S. has received research salaries from the National Competence Centre for Ultrasound and Image Guided Therapy, and E.M.B. has received research funding from the Central Norwegian Brain Tumor Registry. The funding sources had no role in the design of the study, writing of the manuscript, or collection, analysis, and interpretation of data.

O.S. is a previous unpaid member of a National Advisory Committee on Treatment Guidelines for Brain Tumors. All other authors have no duality or conflicts of interest to declare.

noninvasively predict the methylation status. However, results from these studies have also been conflicting (16).

We hypothesized that *MGMT* promoter methylation status could be a surrogate marker of pretreatment phenotypical tumor biology assessed by histopathology and magnetic resonance imaging (MRI) in GBMs. Apart from some radiological studies, few studies have investigated such relationships. By exploring these potential relationships using tissue material and MRI scans collected before treatment, we aimed to discover if there are differences in the inherent aggressiveness between *MGMT* methylated and unmethylated patients (i.e. a prognostic value). Moreover, such potential biological differences may also partially explain the different responses to chemotherapy. Our study could also further elucidate whether *MGMT* status can be predicted from preoperative MRI scans. In a cohort of treatment-naïve, isocitrate dehydrogenase (*IDH*) wild-type (wt) GBMs previously assessed for preoperative growth characteristics (4), we have therefore aimed to investigate whether *MGMT* status was associated with histological and radiological features.

## MATERIALS AND METHODS

### Patients and Samples

The selection of patients was based on the previous work by Stensjøen et al in which the preoperative growth dynamics of GBMs were investigated (4). Patients were retrospectively selected from all patients >18 years operated for newly diagnosed GBMs at St. Olav's University Hospital, Trondheim, Norway between January 2004 and May 2014 (n = 262) (4). Patients with  $\geq 2$  preoperative contrast-enhancing T1-weighted (T1wGd) MRI scans taken  $\geq 14$  days apart were eligible, and patients without contrast enhancement and/or gliomatosis cerebri were excluded (4). All cases were microscopically revised and *IDH* mutation status assessed according to the 2016 World Health Organization (WHO) Classification of Tumors of the Central Nervous System (17). *IDH* mutation status was first assessed using immunohistochemistry (18), and all immune-negative patients <55 years (18 patients) were additionally sequenced using Sanger sequencing according to previously described methods (using the BigDye Terminator v3.1 cycle sequencing kit and the 3130 genetic analyzer from Applied Biosystems, Foster City, CA) (19). Three patients were *IDH* mutated and were therefore excluded from the study. In 5 patients, *IDH2* could not be sequenced; however, these were all *IDH1* wt on sequencing. Due to the very low frequency of *IDH2* mutations in newly diagnosed GBMs (20, 21), these were categorized as *IDH* wt and included in the study. The collection of clinical data regarding survival, treatment, sex, age at diagnosis, and Karnofsky performance status have previously been accounted for (18). Furthermore, of the 106 patients (4) analyzed for *MGMT* promoter methylation status, 18 were excluded (17%) due to inconclusive results. Hence, 85 patients were included in the current study.

### DNA Extraction and *MGMT* Methylation-Specific PCR

For DNA isolation, an area of central tumor morphology (visually 100% tumor cells) was marked on hematoxylin and eosin (H&E) slides from formalin-fixed paraffin-embedded (FFPE) tissue blocks for each patient. Necrotic areas were avoided. Due to a lack of tumor material, 4 cases had a tumor cell content of 40%–70% in the marked areas. The marked areas were manually dissected, and tumor DNA then extracted using the QIAamp DNA FFPE Tissue Kit (Qiagen, Hilden, Germany). QIAcube (Qiagen) was used for automated spin column process of DNA purification following the manufacturer's instructions.

Methylation-specific PCR (MSP) was performed following bisulfite treatment of the isolated DNA using the EpiTect Fast Bisulfite Conversion kit (Qiagen). According to the method by Esteller et al (22), PCR amplification was performed using specific primers covering methylation of the *MGMT* promoter and exon 1 region. Methylated and unmethylated PCR products were detected with 4% agarose gel. An *MGMT* methylation-positive and a negative tissue control were applied during the whole process. The investigator who analyzed and interpreted the MSP data was blinded to other data.

### Histopathology and Immunohistochemistry

All available H&E-stained FFPE sections from each case were assessed for the presence of 22 histopathological features. Definitions of each feature can be found in our previous publication (23). Most features were defined as either present or absent, while cellular density and atypia were semiquantitatively graded. Mitoses were counted in 10 high-power fields in hotspots. In 32 cases (38%), the amount of tissue on H&E slides has previously been subjectively categorized as sparse (23). This semiquantitative categorization was based on the collective area of viable (i.e. nonnecrotic) tumor tissue on all available H&E slides from each patient. Sparse tissue amount was often due to the patient being biopsied or having extensive necrosis in the resected material (23).

The immunohistochemical examinations of *IDH1* R132H (monoclonal, *IDH1* R132H/H09, 1:100, Dianova, Hamburg, Germany) (18), Ki-67/MIB-1 (monoclonal, Ki-67/MIB-1, 1:800 or 1:50, Dako, Glostrup, Denmark) (18), and CD105/endothelin (monoclonal, CD105/endothelin/SN6h, 1:50, Dako) (24) have previously been done and described in detail. The proliferative index (PI) of Ki-67/MIB-1 was quantified as described in our previous publication (18). The degree of angiogenesis has previously been quantified using microvessel density measurements of endothelin/CD105 (24). In short, the microvessel density was computed as the mean count of the number of vascular structures within a grid for 3 high-power fields in hotspots at  $\times 400$  magnification.

### MRI Characteristics and Preoperative Tumor Growth

The MRI segmentations of total tumor volumes, volumes of the contrast enhancing and noncontrast enhancing

compartments, and estimation of speed of tumor growth have previously been accounted for (4, 18). The software Brain-Voyager QX (Brain Innovation, Maastricht, the Netherlands) was used for the volume segmentations (4). The tumor volumes were segmented from 2 preoperative T1wGd MRI scans from each patient (first scan taken at radiological diagnosis and the second preoperative scan for neuronavigation). The MRI characteristics assessed for associations with *MGMT* status were segmented from the second, preoperative scan. Total tumor volume was defined as the combined volume of the contrast enhancing rim and the noncontrast enhancing (necrotic) core. Preoperative speed of growth was estimated from the total tumor volumes at both scans and the interval between them (4, 18). A fitted Gompertzian growth curve from 106 patients was used to dichotomize the patients into having tumors growing faster or slower than expected, as previously described (18).

### Statistical Analyses

Statistical analyses were performed using Stata version 16 (StataCorp LLC, College Station, TX). Statistical significance was set at  $p \leq 0.05$ . Associations between *MGMT* status and categorical variables were analyzed using Chi-square/Fisher’s exact tests, while associations between *MGMT* status and continuous variables were assessed using Mann-Whitney *U* analyses. A Kaplan-Meier plot and the log-rank test were used for the univariable analyses between *MGMT* status and overall survival and a Cox proportional hazard model was used for multivariable survival analyses. The selection of variables in the multivariable model has previously been accounted for (18). All included variables followed the proportional hazard assumption, which was tested using Schoenfeld residuals in Stata.

### Ethics

This study was approved by the Regional Ethics Committee (Central) as part of a larger project (reference numbers 2011/974 and 2013/1348) in accordance with the 1964 Helsinki declaration and later amendments. Most of the patients had provided written informed consent to be included (reference 2011/974), and the Regional Ethics Committee waived informed consent for retrospective evaluation of patient data for the remaining patients.

## RESULTS

### MGMT and Clinical and Radiological Factors

In the 85 included patients, the distributions of age, sex, Karnofsky performance status, Ki-67/MIB-1 PI, and microvessel density of CD105 corresponded to previous reports (18, 24). The relationships between *MGMT* status and clinical and radiological factors are shown in Table 1. *MGMT* status was not significantly associated with any of the clinical factors or MRI volumetrics (Table 1). There was no significant association between *MGMT* status and MRI assessed preoperative speed of growth (Table 1).

### MGMT and Histological Features

Distributions of the 22 histopathological features and the immunohistochemical markers (Ki-67/MIB-1 PI and microvessel density of CD105) in the *MGMT* methylated and unmethylated groups are presented in Table 2. There were no significant associations between *MGMT* status and any of the histological features assessed (Table 2). The difference in the presence of microvascular proliferation in the *MGMT* methylated and unmethylated groups was likely confounded by sparse tissue amount. In our previous work, we found that microvascular proliferation was significantly less present in

**TABLE 1.** *MGMT* and Clinical and Radiological Factors. Distributions of Clinical and Radiological Parameters Within the *MGMT* Methylated and Unmethylated Patient Groups

|                                                       | Methylated <i>MGMT</i><br>(n = 31) | Unmethylated <i>MGMT</i><br>(n = 54) | p Value | Test Performed            |
|-------------------------------------------------------|------------------------------------|--------------------------------------|---------|---------------------------|
| Mean age (SD)                                         | 65 (10.4)                          | 63 (11.2)                            | 0.230   | Two-sample <i>t</i> -test |
| Male                                                  | 71%                                | 69%                                  | 0.814   | Chi-square                |
| Median preoperative total tumor volume (range)        | 28.8 mL (1.0–243.5)                | 31.6 mL (1.0–153.0)                  | 0.777   | Mann-Whitney <i>U</i>     |
| Median preoperative contrast enhancing volume (range) | 16.6 mL (1.0–215.4)                | 18.3 mL (0.9–63.9)                   | 0.913   | Mann-Whitney <i>U</i>     |
| Median preoperative necrotic core volume (range)      | 9.7 mL (0.0–89.9)                  | 8.1 mL (0.1–106.5)                   | 0.695   | Mann-Whitney <i>U</i>     |
| Median preoperative percentage necrosis (range)       | 27.8% (1.4–78.6)                   | 34.9% (3.5–69.9)                     | 0.204   | Mann-Whitney <i>U</i>     |
| Fast-growing tumors <sup>a</sup>                      | 48%                                | 50%                                  | 0.886   | Chi-square                |
| Median KPS (range)                                    | 7.5 (4–10)                         | 8 (5–10)                             | 0.552   | Mann-Whitney <i>U</i>     |
| GTR                                                   | 35%                                | 26%                                  | 0.352   | Chi-square                |
| Chemotherapy                                          | 81%                                | 81%                                  | 0.924   | Chi-square                |
| Radiotherapy                                          | 90%                                | 94%                                  | 0.664   | Fisher’s exact            |
| Median survival                                       | 15.9 months                        | 10.2 months                          | 0.048*  | Log-rank                  |
|                                                       | 95% CI (12.5–26.2)                 | 95% CI (8.6–13.7)                    |         |                           |

*MGMT*, O<sup>6</sup>-methylguanine DNA methyltransferase; SD, standard deviation; KPS, Karnofsky performance status; GTR, gross total resection; CI, confidence interval.

<sup>a</sup>Speed of tumor growth was estimated from segmented tumor volumes from 2 preoperative MRI scans and the interval between them. A fitted Gompertzian growth curve based on the volume data was used to dichotomize the tumors into growing faster or slower than expected from the curve (18).

\*Statistically significant,  $p \leq 0.05$ .

**TABLE 2.** *MGMT* and Histological Features. Distributions of the Histological Features Within the *MGMT* Methylated and Unmethylated Patient Groups

|                                                                | Methylated<br><i>MGMT</i> (n = 31) | Unmethylated<br><i>MGMT</i> (n = 54) | p Value | Test Performed        |
|----------------------------------------------------------------|------------------------------------|--------------------------------------|---------|-----------------------|
| Necrosis                                                       |                                    |                                      |         |                       |
| Small                                                          | 84%                                | 81%                                  | 0.781   | Chi-square            |
| Large                                                          | 94%                                | 89%                                  | 0.705   | Fisher's exact        |
| Palisades <sup>a</sup>                                         | 84%                                | 72%                                  | 0.206   | Chi-square            |
| Microvascular proliferation <sup>b</sup>                       | 100%                               | 90%                                  | 0.249   | Fisher's exact        |
| High cellular density                                          | 42%                                | 33%                                  | 0.428   | Chi-square            |
| Severe atypia                                                  | 16%                                | 26%                                  | 0.297   | Chi-square            |
| Median mitotic count (range)                                   | 16.0<br>(0–43)                     | 11.5<br>(0–65)                       | 0.109   | Mann-Whitney <i>U</i> |
| Vascular features                                              |                                    |                                      |         |                       |
| Thrombosis                                                     | 81%                                | 87%                                  | 0.534   | Fisher's exact        |
| Hemorrhage                                                     | 87%                                | 78%                                  | 0.290   | Chi-square            |
| Pseudorosettes <sup>c</sup>                                    | 29%                                | 25%                                  | 0.726   | Chi-square            |
| Secondary structures of Scherer <sup>d</sup>                   | 70%                                | 71%                                  | 0.911   | Chi-square            |
| Desmoplasia                                                    | 65%                                | 67%                                  | 0.840   | Chi-square            |
| Leukocytes                                                     |                                    |                                      |         |                       |
| Macrophages                                                    | 97%                                | 91%                                  | 0.409   | Fisher's exact        |
| Lymphocytic infiltrates                                        | 58%                                | 76%                                  | 0.085   | Chi-square            |
| Small cell glioblastoma                                        | 23%                                | 17%                                  | 0.502   | Chi-square            |
| Cell types                                                     |                                    |                                      |         |                       |
| Gemistocytes                                                   | 29%                                | 19%                                  | 0.263   | Chi-square            |
| Small cells                                                    | 29%                                | 22%                                  | 0.483   | Chi-square            |
| Sarcomatous cells                                              | 13%                                | 20%                                  | 0.385   | Chi-square            |
| Myxomatoid                                                     | 6%                                 | 17%                                  | 0.314   | Fisher's exact        |
| Giant cells                                                    | 6%                                 | 11%                                  | 0.705   | Fisher's exact        |
| Primitive neuronal component                                   | 6%                                 | 11%                                  | 0.705   | Fisher's exact        |
| Oligodendroglial cells                                         | 10%                                | 6%                                   | 0.664   | Fisher's exact        |
| Median Ki-67/MIB-1 PI (range)                                  | 17.5%<br>(4.3–40.7)                | 13.2%<br>(1.4–57.3)                  | 0.333   | Mann-Whitney <i>U</i> |
| Median microvessel density count of CD105 <sup>e</sup> (range) | 15.2<br>(4–42.7)                   | 11.8<br>(0.7–50)                     | 0.216   | Mann-Whitney <i>U</i> |

*MGMT*, O<sup>6</sup>-methylguanine DNA methyltransferase; PI, proliferative index.

<sup>a</sup>Includes only tumors with central tumor morphology in the analysis (n = 84) (23).

<sup>b</sup>Tumors with sparse tissue amount were excluded from the analysis (53 included cases), because sparse tissue amount was likely a confounder of the association between microvascular proliferation and *MGMT* status.

<sup>c</sup>Includes only tumors with paraffin sections with viable central tumor morphology (n = 82) (23).

<sup>d</sup>Recorded as present when ≥1 of the following features were observed: Perineuronal satellitosis, angiocentric structures, or subpial clustering, as previously defined (23). Only recorded in tumors containing infiltration zones into gray matter (n = 55).

<sup>e</sup>Includes only tumors with enough tissue amount or adequate morphology for the microvessel density assessment (n = 82) (24).

cases with sparse tissue amount ( $p < 0.001$ , Chi-square test, unpublished student thesis). In addition, there was a near-significant trend of more *MGMT* unmethylated cases in cases with sparse tissue material ( $p = 0.088$ , Chi-square test) in the current study. To avoid this confounding effect, microvascular proliferation was redefined to only include well-sampled cases (Table 2). Microvascular proliferation was significantly associated with methylated *MGMT* status when not corrected for tissue amount ( $p = 0.018$ , Chi-square test).

### ***MGMT* and Survival**

The median overall survival was 13.3 months (95% confidence interval [CI] 9.9–15.7). Methylated *MGMT* status was

significantly associated with overall survival both in the univariable analysis (Table 1; Fig. 1) and in the multivariable Cox model (Table 3).

## **DISCUSSION**

*MGMT* promoter methylation is a pivotal predictive marker in *IDH* wt GBMs. However, we did not find any significant associations between the *MGMT* promoter methylation status and several biological parameters in treatment-naïve patients. These parameters included 22 histopathological features, proliferative activity, degree of angiogenesis, quantitative MRI volumetrics, and preoperative speed of radiological tumor growth. Altogether, these findings suggest

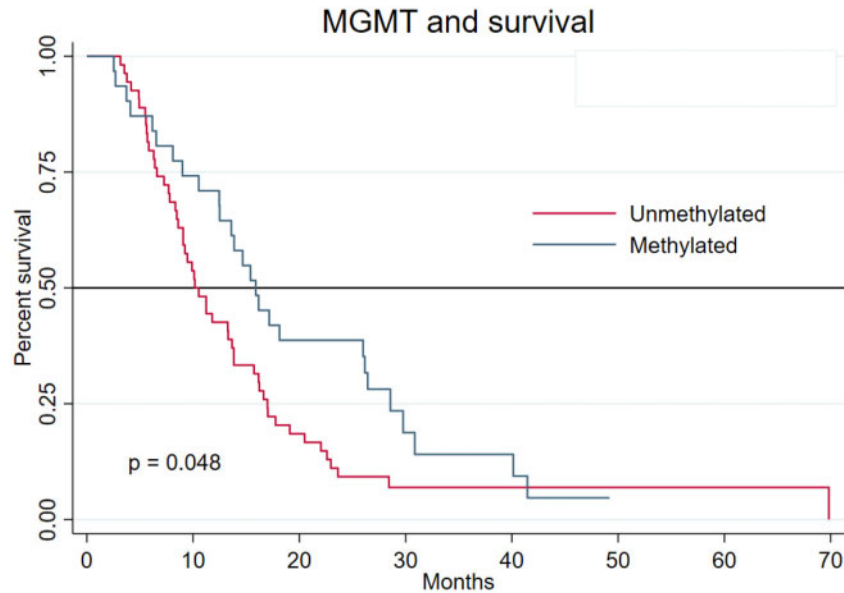

**FIGURE 1.** Kaplan-Meier plot of overall survival of *MGMT* methylated (blue line) and *MGMT* unmethylated (red line) patients. *MGMT* methylated patients survived significantly longer than unmethylated ( $p=0.048$ , log-rank test). *MGMT*,  $O^6$ -methylguanine DNA methyltransferase.

**TABLE 3.** Survival Analyses. Univariable and Multivariable Cox Analyses

|                               | Univariable HR (95% CI) | p Value | Multivariable HR (95% CI) | p Value |
|-------------------------------|-------------------------|---------|---------------------------|---------|
| Age                           | 1.01 (0.99–1.03)        | 0.332   | 1.00 (0.98–1.03)          | 0.790   |
| KPS                           | 0.68 (0.57–0.82)        | <0.001* | 0.75 (0.60–0.95)          | 0.017*  |
| Preoperative tumor volume     | 1.01 (1.00–1.01)        | 0.042*  | 1.00 (0.99–1.01)          | 0.956   |
| GTR                           | 0.69 (0.42–1.14)        | 0.150   | 0.66 (0.37–1.18)          | 0.162   |
| Chemotherapy                  | 0.17 (0.09–0.32)        | <0.001* | 0.27 (0.13–0.58)          | 0.001*  |
| Radiation                     | 0.05 (0.02–0.14)        | <0.001* | 0.12 (0.04–0.38)          | <0.001* |
| Methylated <i>MGMT</i> status | 0.62 (0.39–1.00)        | 0.051   | 0.60 (0.37–0.97)          | 0.038*  |

HR, hazard ratio; CI, confidence interval; KPS, Karnofsky performance status; GTR, gross total resection; *MGMT*,  $O^6$ -methylguanine DNA methyltransferase.  
\*Statistically significant,  $p \leq 0.05$ .

that *MGMT* status is not a surrogate marker of the pretreatment phenotypical biology of *IDH* wt GBMs.

Tumor biology has been extensively studied using experimental models; however, these models will never fully mimic the unique micro-environment of human GBMs (25). In this study, tissue samples were obtained from the first surgical intervention and only preoperative MRI scans were assessed. Hence, the assessed biological features were unaffected by radiochemotherapy. Nevertheless, 82% ( $n=70$ ) were preoperatively treated with corticosteroids, and there was a nonsignificant trend ( $p=0.144$ ) of more corticosteroid use in *MGMT* methylated tumors (data not shown). Therefore, we cannot entirely exclude corticosteroid use as a confounding factor. In summary, our study enabled us to study links between the phenotypical biology and *MGMT* status occurring during the natural history of human *IDH* wt GBMs.

### **MGMT and Histology**

We could not find any significant associations between *MGMT* status and the histopathological features or immunohistochemically assessed degree of proliferation and angiogenesis (Table 2). Few previous studies have investigated relationships between *MGMT* status and histological features. However, Hegi et al investigated such relationships by looking at 13 morphological features in newly diagnosed GBM patients (26). Yet, they only found a significant association between methylated *MGMT* status and higher Ki-67/MIB-1 PI. However, this association is limited by various aspects of the assessments of Ki-67/MIB-1 PI (23, 27, 28). Pistollato et al found a higher *MGMT* expression (corresponding to unmethylated tumors) in the hypoxic, inner core of GBMs (29). They also found that cells derived from these areas were more resistant to temozolomide, which was further related to the higher *MGMT* expression (29). In our previous studies, we found that

thromboses independently predicted faster tumor growth, which indicated that hypoxia drives faster tumor growth (23, 24). Because our previous publications included *IDH* mutant tumors and that thromboses have been found to associate with *IDH1* wt status (30), we reanalyzed the data from our previous publications while including only *IDH* wt GBMs. The reanalysis showed similar results, suggesting that thromboses promote aggressiveness also among *IDH* wt GBMs. Interestingly, neither thromboses nor faster preoperative growth were associated with *MGMT* status in the current study (Tables 1 and 2).

Previous experimental studies have also linked *MGMT* expression to increased hypoxia (31–33) and decreased angiogenesis (34) in GBM cell lines. However, these results are conflicting, as hypoxia is known to be an important inducer of angiogenesis (35). Furthermore, a recent comprehensive genomic study showed considerable differences in mRNA expression profiles and DNA methylation profiles between GBM patient material and the in vitro and in vivo models derived from it (36). These findings illustrate challenges in extrapolating findings from experimental models on *MGMT* methylation status and expression. Altogether, the inconsistent results from previous pathological and experimental studies are in line with our findings, which suggest *MGMT* methylation status is not linked to pretreatment histology in GBMs.

### ***MGMT* and MRI**

We found no significant associations between *MGMT* status and total tumor volumes, contrast enhancing volumes, necrotic volumes, the percentage of necrosis, or preoperative speed of growth (Table 1). As mentioned, previous radiological studies have aimed to noninvasively predict *MGMT* status using conventional and advanced MRI characteristics. However, results have been conflicting and derived no expert consensus (16). Still, most studies have found significant associations between unmethylated *MGMT* status and MRI parameters indicating increased aggressiveness, such as more necrosis (37) and higher vascularity. Higher vascularity was in these studies measured as (i) ring enhancement (37, 38), (ii) higher normalized relative cerebral blood volume (39), (iii) higher relative cerebral blood flow (16), (iv) more edema (40), and (v) lower apparent diffusion coefficient (also indicating increased cellularity) (16, 41). On the contrary, others have found methylated *MGMT* status to significantly associate with necrosis (16), lower apparent diffusion coefficient (42), and higher relative cerebral blood volume (43). In line with our study, others found no significant associations between *MGMT* status and conventional MRI features (44–47). Nevertheless, machine learning approaches might be a way to advance and have thus far shown both promising (47–50) and negative results (45). In summary, our results along with the previous conflicting studies indicate that *MGMT* status cannot yet be noninvasively predicted from MRI scans.

### ***MGMT* and Survival**

*MGMT* promoter methylation was an independent predictor for improved survival when adjusted for several clinical factors in the multivariable analyses (Table 3). However, this

does not necessarily mean that methylated *MGMT* status is an independent prognostic factor, as *MGMT* status may have affected the temozolomide use in the studied patients. As defined by Clark, a prognostic factor is “associated with clinical outcome in the absence of therapy or with the application of a standard therapy that patients are likely to receive” (51). Hence, it is a feature of the natural history of the disease. A predictive factor is “associated with response or lack of response to a particular therapy” (51). Ideally, predictive factors should be studied in randomized controlled trials (RCTs), isolating the effect of the potential biomarker related to treatment. Prognostic factors are better studied in cohort studies where treatment is not dependent on the studied biomarker. In our study, most patients received chemotherapy regardless of the *MGMT* status (Table 1). However, among elderly GBM patients, the Stupp protocol is more seldom given and patients with *MGMT* methylated tumors may be selected for chemotherapy alone (12). Second-line chemotherapy is also more likely to be given to patients with *MGMT* methylated lesions. Thus, since *MGMT* status is to some extent used for treatment decisions, the seemingly independent effect of *MGMT* status on survival in the multivariable analyses may be colored by the use of *MGMT* status for treatment selection.

Our finding that *MGMT* status was not related to pretreatment phenotypical tumor biology indicates that methylated *MGMT* status is not associated with an intrinsically less aggressive tumor biology. This further suggests methylated *MGMT* status is not a prognostic factor by itself but merely a predictive marker. As mentioned, previous studies have shown conflicting results regarding the prognostic value of *MGMT* status among patients who were not treated with chemotherapy. Three RCTs on elderly patients (11–13) and a retrospective cohort from the preStupp area (14) did not find a significant difference in overall survival according to *MGMT* status in the radiotherapy-only treated group. Conversely, the EORTC-NCIC RCT on younger patients (8, 52) and a retrospective study by Rivera et al (15) found a prognostic value of *MGMT* status within the same patient group. However, second-line therapy with temozolomide was given to a higher percentage of the radiotherapy-only patients in the EORTC-NCIC trial (~60%) than in the 3 other RCTs (~30% in all) (11–13). Furthermore, in the EORTC-NCIC trial, they argue that the survival benefit is probably due to an effect of second-line chemotherapy, as the progression-free survival was short and the overall survival relatively long in the *MGMT* methylated cases in the radiotherapy-only group (8, 52). Moreover, Rivera et al found that methylated *MGMT* status also predicted an increased response to radiotherapy (15). They further speculated whether methylated *MGMT* status could represent a surrogate marker of improved treatment response in general or of undiscovered processes causing an inherently less aggressive tumor biology (15). However, our study suggests the latter speculation is not the case in *IDH* wt GBMs. Moreover, our results also indicate that the increased response to chemotherapy in *MGMT* methylated GBMs is not due to pretreatment differences in phenotypical tumor biology. Altogether, our findings along with previous studies indicate the increased survival of *MGMT* promoter methylated patients is due to an

increased response to therapy, and not due to an intrinsically less aggressive tumor biology.

## Methodological Aspects

To date there is no consensus regarding the best assay for detecting the *MGMT* methylation status (53, 54). We used MSP, which has been related to survival in several pivotal clinical studies (8, 10, 22, 53). The finding of 36% *MGMT* methylated cases corresponds to the 30%–60% in previous studies (10). Interestingly, there was a near-significant trend of more *MGMT* unmethylated tumors when tumor material was sparse ( $p = 0.088$ ). This association is perhaps due to the assay's propensity toward more false negatives when the amount of isolated DNA is low. Intratumoral heterogeneity in *MGMT* status has also been reported (55, 56), which may contribute to a higher risk of false negative results in cases with sparse tissue. Further technical limitations of the MSP assay have been elaborated elsewhere (10, 54, 57). Still, the primers used in this study correspond to an area of the promoter found to best correlate with survival and *MGMT* expression in patients with GBM (58, 59).

Limitations regarding the collection of clinical data, the histopathological and immunohistochemical assessments, the segmentation of tumor volumes and different tumor compartments, and the estimation of growth rates have previously been described in detail (4, 18, 23, 24). The relatively large population of treatment-naïve patients with a population-based referral and the preoperative MRI assessments are the main strengths of the study. Important limitations are potential selection biases, preoperative corticosteroid treatment, sampling errors and interobserver variability of the histological assessments, and the explorative nature of the statistical analyses. We chose not to correct for multiple statistical testing despite the increased risk of false positive findings. Interestingly, based on the set  $p$  value of  $\leq 0.05$ , one would expect at least one false positive finding of the 29 performed statistical tests between *MGMT* status and biological features. Hence, the fact that none of these tests were significant further supports our conclusion that *MGMT* status is not related to pretreatment phenotypical tumor biology. Assuming a standardized effect size of 0.8, the power was estimated to be  $\sim 90\%$  for each analysis between *MGMT* status and the biological features. The results should be validated in future studies.

## Conclusion

In conclusion, we did not find any significant associations between *MGMT* promoter methylation status and histological or MRI features in treatment-naïve *IDH* wt GBM patients. These findings suggest *MGMT* status is not related to the pretreatment phenotypical biology in *IDH* wt GBMs, which indicate that the increased survival of *MGMT* methylated patients is not due to an inherently less aggressive tumor biology. Also, our findings suggest that preoperative conventional MRI characteristics cannot be used for noninvasive prediction of the *MGMT* status.

## ACKNOWLEDGMENTS

We would like to thank Mona Jonsson, Tore Skaldebø, Tone Furre, Ingeborg Engesvold, and Torild Gladsø for the excellent laboratory work with the methylation-specific PCR analyses of the *MGMT* promoter methylation status at the Department of Pathology, St. Olav's University Hospital. We would also like to thank the staff at the Cellular and Molecular Imaging Core Facility (CMIC), NTNU-Norwegian University of Science and Technology for outstanding laboratory work with the histological and immunohistochemical analyses. Open Access funding provided by NTNU-Norwegian University of Science and Technology.

## REFERENCES

- Ostrom QT, Gittleman H, Truitt G, et al. CBTRUS statistical report: Primary brain and other central nervous system tumors diagnosed in the United States in 2011–2015. *Neuro-Oncology* 2018;20:iv1–iv86
- Ronning PA, Helseth E, Meling TR, et al. A population-based study on the effect of temozolomide in the treatment of glioblastoma multiforme. *Neuro-Oncology* 2012;14:1178–84
- Stupp R, Mason WP, van den Bent MJ, et al. Radiotherapy plus concomitant and adjuvant temozolomide for glioblastoma. *N Engl J Med* 2005;352:987–96
- Stensjøen AL, Solheim O, Kvistad KA, et al. Growth dynamics of untreated glioblastomas in vivo. *Neuro Oncol* 2015;17:1402–11
- Burger PC, Kleihues P. Cytologic composition of the untreated glioblastoma with implications for evaluation of needle biopsies. *Cancer* 1989;63:2014–23
- Habberstad AH, Lind-Landstöm T, Torp SH. The histopathological spectrum of primary human glioblastomas with relations to tumour biology. *J Clin Exp Pathol* 2012;2:110
- Sottoriva A, Spiteri I, Piccirillo SG, et al. Intratumor heterogeneity in human glioblastoma reflects cancer evolutionary dynamics. *Proc Natl Acad Sci USA* 2013;110:4009–14
- Hegi ME, Diserens AC, Gorlia T, et al. *MGMT* gene silencing and benefit from temozolomide in glioblastoma. *N Engl J Med* 2005;352:997–1003
- Weller M, van den Bent M, Tonn JC, et al. European Association for Neuro-Oncology (EANO) guideline on the diagnosis and treatment of adult astrocytic and oligodendroglial gliomas. *Lancet Oncol* 2017;18:e315–e29
- Weller M, Stupp R, Reifenberger G, et al. *MGMT* promoter methylation in malignant gliomas: Ready for personalized medicine? *Nat Rev Neurol* 2010;6:39–51
- Wick W, Platten M, Meisner C, et al. Temozolomide chemotherapy alone versus radiotherapy alone for malignant astrocytoma in the elderly: The NOA-08 randomised, phase 3 trial. *Lancet Oncol* 2012;13:707–15
- Malmstrom A, Gronberg BH, Marosi C, et al. Temozolomide versus standard 6-week radiotherapy versus hypofractionated radiotherapy in patients older than 60 years with glioblastoma: The Nordic randomised, phase 3 trial. *Lancet Oncol* 2012;13:916–26
- Perry JR, Laperriere N, O'Callaghan CJ, et al. Short-course radiation plus temozolomide in elderly patients with glioblastoma. *N Engl J Med* 2017;376:1027–37
- Criniere E, Kaloshi G, Laigle-Donadey F, et al. *MGMT* prognostic impact on glioblastoma is dependent on therapeutic modalities. *J Neurooncol* 2007;83:173–9
- Rivera AL, Pelloski CE, Gilbert MR, et al. *MGMT* promoter methylation is predictive of response to radiotherapy and prognostic in the absence of adjuvant alkylating chemotherapy for glioblastoma. *Neuro-Oncology* 2010;12:116–21
- Han Y, Yan LF, Wang XB, et al. Structural and advanced imaging in predicting *MGMT* promoter methylation of primary glioblastoma: A region of interest based analysis. *BMC Cancer* 2018;18:215
- Louis DN, Ohgaki H, Wiestler O, et al. WHO Classification of Tumours of the Central Nervous System. Revised 4th ed. 1211 Geneva 27, Switzerland: International Agency for Research on Cancer (IARC) 2016

18. Stensj oen AL, Berntsen EM, Mikkelsen VE, et al. Does pretreatment tumor growth hold prognostic information for patients with glioblastoma? *World Neurosurg* 2017;101:686–94.e4
19. Jakola AS, Skjulsvik AJ, Myrnel KS, et al. Surgical resection versus watchful waiting in low-grade gliomas. *Ann Oncol* 2017;28:1942–8
20. Brennan CW, Verhaak RG, McKenna A, et al. The somatic genomic landscape of glioblastoma. *Cell* 2013;155:462–77
21. Kloosterhof NK, Bralten LB, Dubbink HJ, et al. Isocitrate dehydrogenase-1 mutations: A fundamentally new understanding of diffuse glioma? *Lancet Oncol* 2011;12:83–91
22. Esteller M, Garcia-Foncillas J, Andion E, et al. Inactivation of the DNA-repair gene MGMT and the clinical response of gliomas to alkylating agents. *N Engl J Med* 2000;343:1350–4
23. Mikkelsen VE, Stensj oen AL, Berntsen EM, et al. Histopathologic features in relation to pretreatment tumor growth in patients with glioblastoma. *World Neurosurg* 2018;109:e50–e8
24. Mikkelsen VE, Stensj oen AL, Granli US, et al. Angiogenesis and radiological tumor growth in patients with glioblastoma. *BMC Cancer* 2018;18:862
25. Huszthy PC, Daphu I, Niclou SP, et al. In vivo models of primary brain tumors: Pitfalls and perspectives. *Neuro-Oncology* 2012;14:979–93
26. Hegi ME, Janzer RC, Lambiv WL, et al. Presence of an oligodendroglioma-like component in newly diagnosed glioblastoma identifies a pathogenetically heterogeneous subgroup and lacks prognostic value: Central pathology review of the EORTC\_26981/NCIC\_CE.3 trial. *Acta Neuropathol* 2012;123:841–52
27. Prayson RA. Cell proliferation and tumors of the central nervous system, part II: Radiolabeling, cytometric, and immunohistochemical techniques. *J Neuropathol Exp Neurol* 2002;61:663–72
28. Skjulsvik AJ, Mork JN, Torp MO, et al. Ki-67/MIB-1 immunostaining in a cohort of human gliomas. *Int J Clin Exp Pathol* 2014;7:8905–10
29. Pistollato F, Abbadi S, Rampazzo E, et al. Intratumoral hypoxic gradient drives stem cells distribution and MGMT expression in glioblastoma. *Stem Cells* 2010;28:851–62
30. Unruh D, Schwarze SR, Khoury L, et al. Mutant IDH1 and thrombosis in gliomas. *Acta Neuropathol* 2016;132:917–30
31. Persano L, Pistollato F, Rampazzo E, et al. BMP2 sensitizes glioblastoma stem-like cells to Temozolomide by affecting HIF-1 $\alpha$  stability and MGMT expression. *Cell Death Dis* 2012;3:e412
32. Tang JH, Ma ZX, Huang GH, et al. Downregulation of HIF-1 $\alpha$  sensitizes U251 glioma cells to the temozolomide (TMZ) treatment. *Exp Cell Res* 2016;343:148–58
33. Wang P, Lan C, Xiong S, et al. HIF1 $\alpha$  regulates single differentiated glioma cell dedifferentiation to stem-like cell phenotypes with high tumorigenic potential under hypoxia. *Oncotarget* 2017;8:28074–92
34. Chahal M, Xu Y, Lesniak D, et al. MGMT modulates glioblastoma angiogenesis and response to the tyrosine kinase inhibitor sunitinib. *Neuro-Oncology* 2010;12:822–33
35. Hardee ME, Zagzag D. Mechanisms of glioma-associated neovascularization. *Am J Pathol* 2012;181:1126–41
36. Shen Y, Grisdale CJ, Islam SA, et al. Comprehensive genomic profiling of glioblastoma tumors, BTICs, and xenografts reveals stability and adaptation to growth environments. *Proc Natl Acad Sci USA* 2019;116:19098–108
37. Eoli M, Menghi F, Bruzzone MG, et al. Methylation of O<sup>6</sup>-methylguanine DNA methyltransferase and loss of heterozygosity on 19q and/or 17p are overlapping features of secondary glioblastomas with prolonged survival. *Clin Cancer Res* 2007;13:2606–13
38. Drabycz S, Roldan G, de Robles P, et al. An analysis of image texture, tumor location, and MGMT promoter methylation in glioblastoma using magnetic resonance imaging. *Neuroimage* 2010;49:1398–405
39. Ryoo I, Choi SH, Kim JH, et al. Cerebral blood volume calculated by dynamic susceptibility contrast-enhanced perfusion MR imaging: Preliminary correlation study with glioblastoma genetic profiles. *PLoS ONE* 2013;8:e71704
40. Ellingson BM, Cloughesy TF, Pope WB, et al. Anatomic localization of O<sup>6</sup>-methylguanine DNA methyltransferase (MGMT) promoter methylated and unmethylated tumors: A radiographic study in 358 de novo human glioblastomas. *Neuroimage* 2012;59:908–16
41. Romano A, Calabria LF, Tavanti F, et al. Apparent diffusion coefficient obtained by magnetic resonance imaging as a prognostic marker in glioblastomas: Correlation with MGMT promoter methylation status. *Eur Radiol* 2013;23:513–20
42. Pope WB, Lai A, Mehta R, et al. Apparent diffusion coefficient histogram analysis stratifies progression-free survival in newly diagnosed bevacizumab-treated glioblastoma. *AJNR Am J Neuroradiol* 2011;32:882–9
43. Hempel JM, Schittenhelm J, Klose U, et al. In vivo molecular profiling of human glioma: Cross-sectional observational study using dynamic susceptibility contrast magnetic resonance perfusion imaging. *Clin Neuro-radiol* 2019;29:479–91
44. Ahn SS, Shin NY, Chang JH, et al. Prediction of methylguanine methyltransferase promoter methylation in glioblastoma using dynamic contrast-enhanced magnetic resonance and diffusion tensor imaging. *J Neurosurg* 2014;121:367–73
45. Kickingereder P, Bonekamp D, Nowosielski M, et al. Radiogenomics of glioblastoma: Machine learning-based classification of molecular characteristics by using multiparametric and multiregional MR imaging features. *Radiology* 2016;281:907–18
46. Gupta A, Omuro AM, Shah AD, et al. Continuing the search for MR imaging biomarkers for MGMT promoter methylation status: Conventional and perfusion MRI revisited. *Neuroradiology* 2012;54:641–3
47. Korfiatis P, Kline TL, Coufalova L, et al. MRI texture features as biomarkers to predict MGMT methylation status in glioblastomas. *Med Phys* 2016;43:2835–44
48. Li ZC, Bai H, Sun Q, et al. Multiregional radiomics features from multiparametric MRI for prediction of MGMT methylation status in glioblastoma multiforme: A multicentre study. *Eur Radiol* 2018;28:3640–50
49. Xi YB, Guo F, Xu ZL, et al. Radiomics signature: A potential biomarker for the prediction of MGMT promoter methylation in glioblastoma. *J Magn Reson Imaging* 2018;47:1380–7
50. Hajianfar G, Shiri I, Maleki H, et al. Noninvasive O<sup>6</sup> methylguanine-DNA methyltransferase status prediction in glioblastoma multiforme cancer using magnetic resonance imaging radiomics features: Univariate and multivariate radiogenomics analysis. *World Neurosurg* 2019;132:e140–e61
51. Clark GM. Prognostic factors versus predictive factors: Examples from a clinical trial of erlotinib. *Mol Oncol* 2008;1:406–12
52. Gorlia T, van den Bent MJ, Hegi ME, et al. Nomograms for predicting survival of patients with newly diagnosed glioblastoma: Prognostic factor analysis of EORTC and NCIC trial 26981-22981/CE.3. *Lancet Oncol* 2008;9:29–38
53. Mansouri A, Hachem LD, Mansouri S, et al. MGMT promoter methylation status testing to guide therapy for glioblastoma: Refining the approach based on emerging evidence and current challenges. *Neuro-Oncology* 2019;21:167–78
54. Malmstr om A, Lysiak M, Kristensen BW, et al. Do we really know who has an MGMT methylated glioma? Results of an international survey regarding use of MGMT analyses for glioma. *Neuro-Oncol Pract* 2020;7:68–76
55. Wenger A, Ferreyra Vega S, Kling T, et al. Intratumor DNA methylation heterogeneity in glioblastoma: Implications for DNA methylation-based classification. *Neuro-Oncology* 2019;21:616–27
56. Parker NR, Hudson AL, Khong P, et al. Intratumoral heterogeneity identified at the epigenetic, genetic and transcriptional level in glioblastoma. *Sci Rep* 2016;6:22477
57. Dullea A, Marignol L. MGMT testing allows for personalised therapy in the temozolomide era. *Tumor Biol* 2016;37:87–96
58. Bady P, Sciuscio D, Diserens AC, et al. MGMT methylation analysis of glioblastoma on the Infinium methylation BeadChip identifies two distinct CpG regions associated with gene silencing and outcome, yielding a prediction model for comparisons across datasets, tumor grades, and CIMP-status. *Acta Neuropathol* 2012;124:547–60
59. Malley DS, Hamoudi RA, Kocialewski S, et al. A distinct region of the MGMT CpG island critical for transcriptional regulation is preferentially methylated in glioblastoma cells and xenografts. *Acta Neuropathol* 2011;121:651–61
